# Supplementary material for: Electric power generation using paper materials
Source: Royal Society of Chemistry journal article supplement (doi:10.1039/c9ta08264f), 2019-01-01
Supplement: c9ta08264f2.pdf [file c9ta08264f2.pdf]

## **Supporting Information**

### **Electric power generation by paper materials**

Xue Gao, Tong Xu, Changxiang Shao, Yuyang Han, Bing Lu, Zhipan Zhang\* and Liangti Qu\*

Beijing Key Laboratory of Photoelectronic/Electrophotonic Conversion Materials, Key Laboratory of Cluster Science, Ministry of Education, School of Chemistry and Chemical Engineering, Beijing Institute of Technology, Beijing 100081, P. R. China. E-mail: [zhipan@bit.edu.cn](mailto:zhipan@bit.edu.cn); [lqu@bit.edu.cn](mailto:lqu@bit.edu.cn)

Table S1 Surface elemental composition of print paper.

| Elements | Mass % | Atomic % |
|----------|--------|----------|
| C        | 45.57  | 53.82    |
| O        | 50.41  | 44.69    |
| Ti       | 0.06   | 0.02     |
| S        | 0.06   | 0.03     |
| Ca       | 3.54   | 1.25     |
| Cl       | 0.01   | 0.00     |
| Al       | 0.11   | 0.06     |
| Si       | 0.14   | 0.07     |
| Mg       | 0.09   | 0.05     |
| Total    | 100.00 | 100.00   |

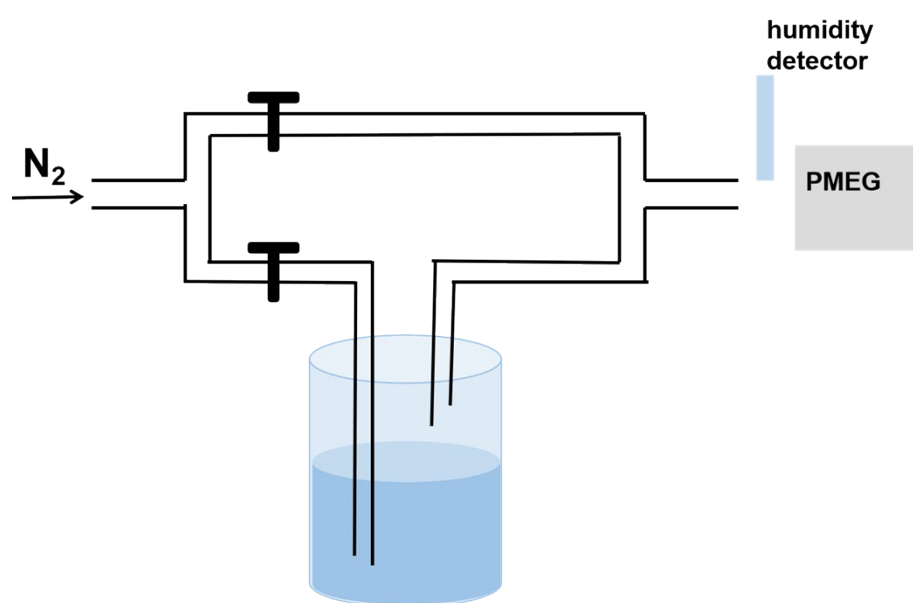

Fig. S1 The schematic diagram of moisture circulating system.

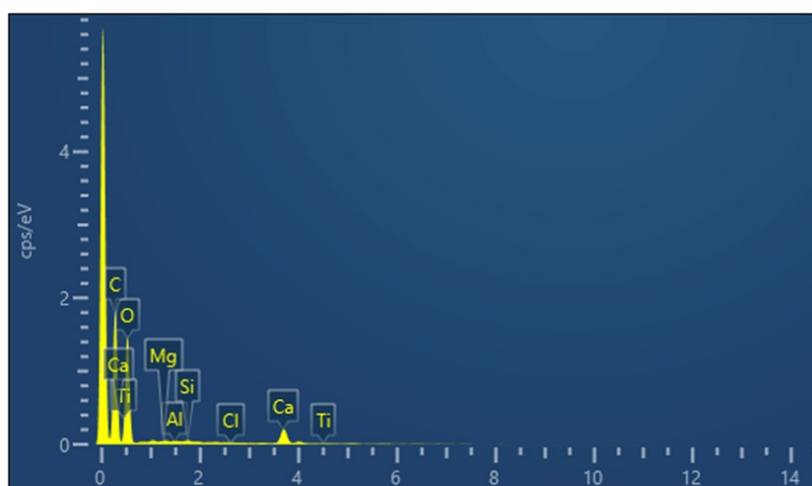

Fig. S2 EDS characterization of print paper.

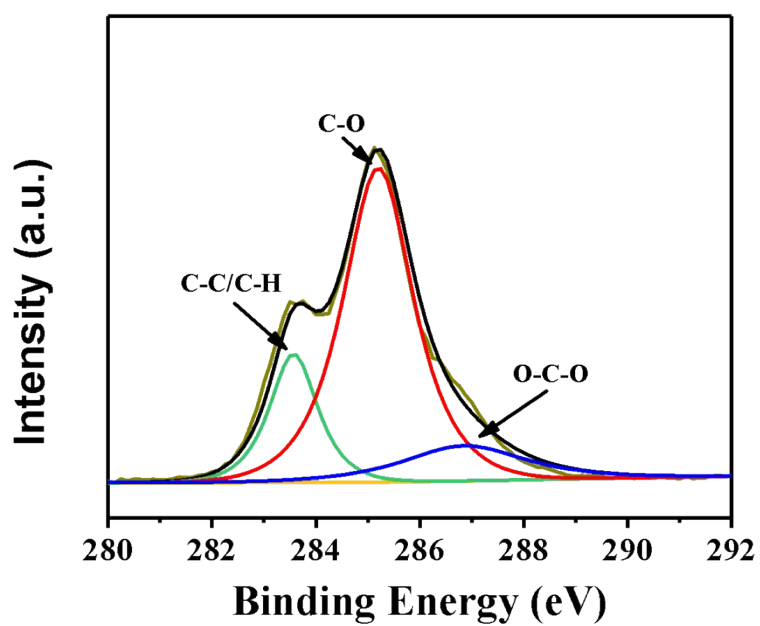

Fig. S3 XPS characterization of print paper.

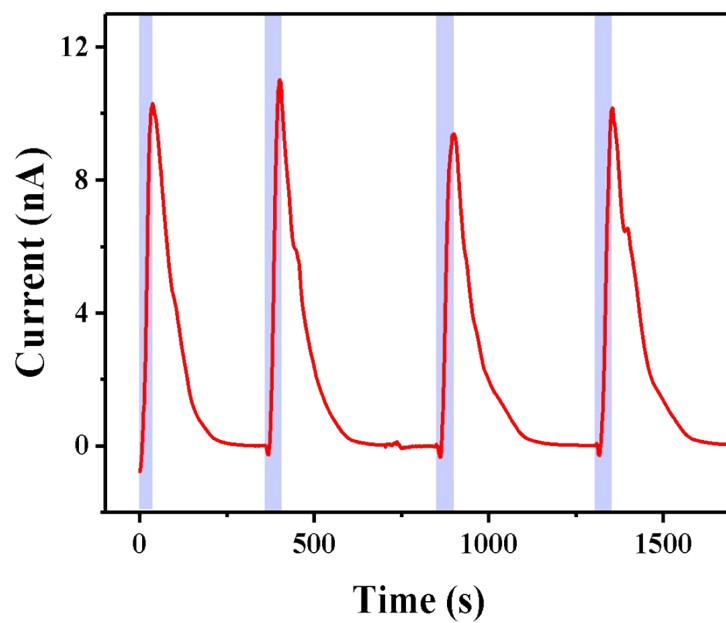

Fig. S4 Generated current of print paper. Hydroelectric material area:  $1.5 \text{ cm}^2$ , at room temperature with 70%  $\Delta\text{RH}$ .

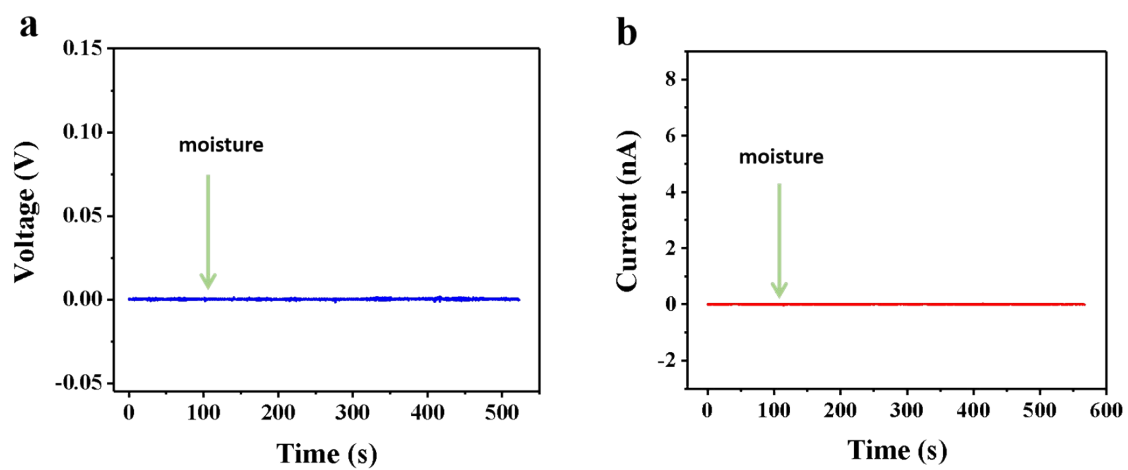

Fig. S5 Generated (a) voltage and (b) current of the PMEG when the paper sheet was removed. Measurements were taken at room temperature with 70%  $\Delta$ RH.

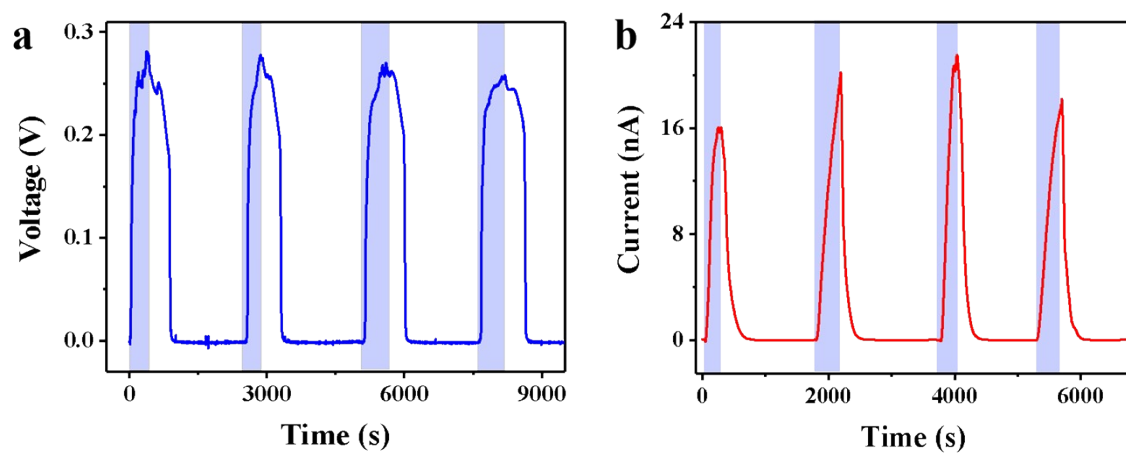

Fig. S6 Generated (a) voltage and (b) current of carboxymethyl cellulose film. Hydroelectric material area:  $1.5 \text{ cm}^2$ , at room temperature with 70%  $\Delta\text{RH}$ .

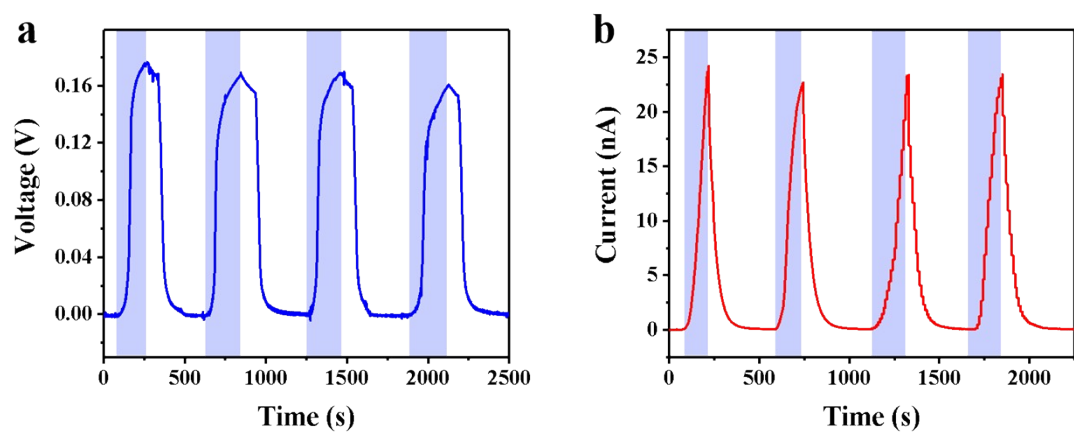

Fig. S7 Generated (a) voltage and (b) current of filter paper. Hygroelectric material area:  $1.5 \text{ cm}^2$ , at room temperature with 70%  $\Delta\text{RH}$ .

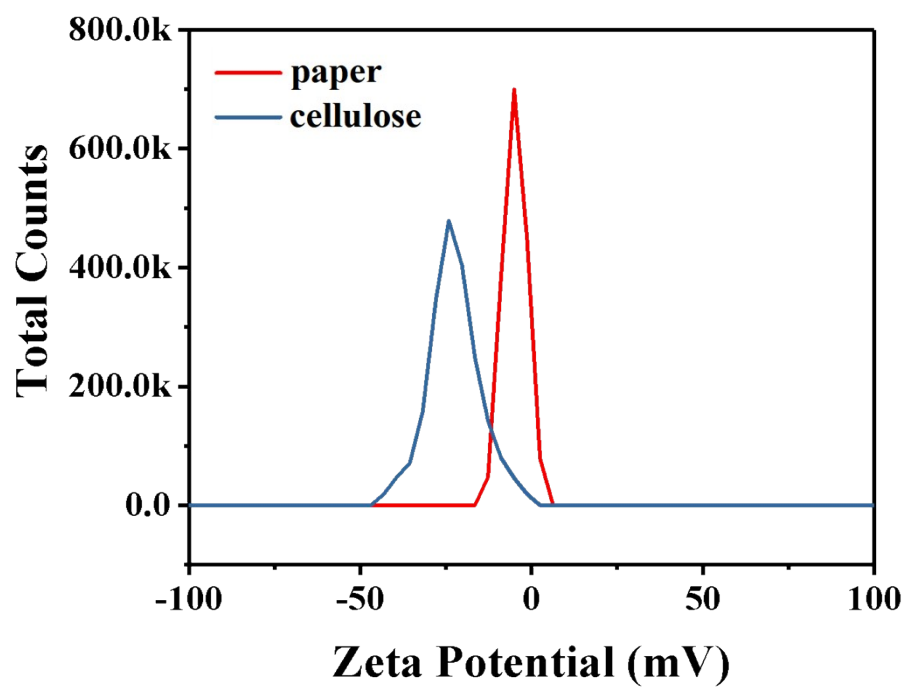

Fig. S8 Zeta Potential of print paper and carboxymethyl cellulose.

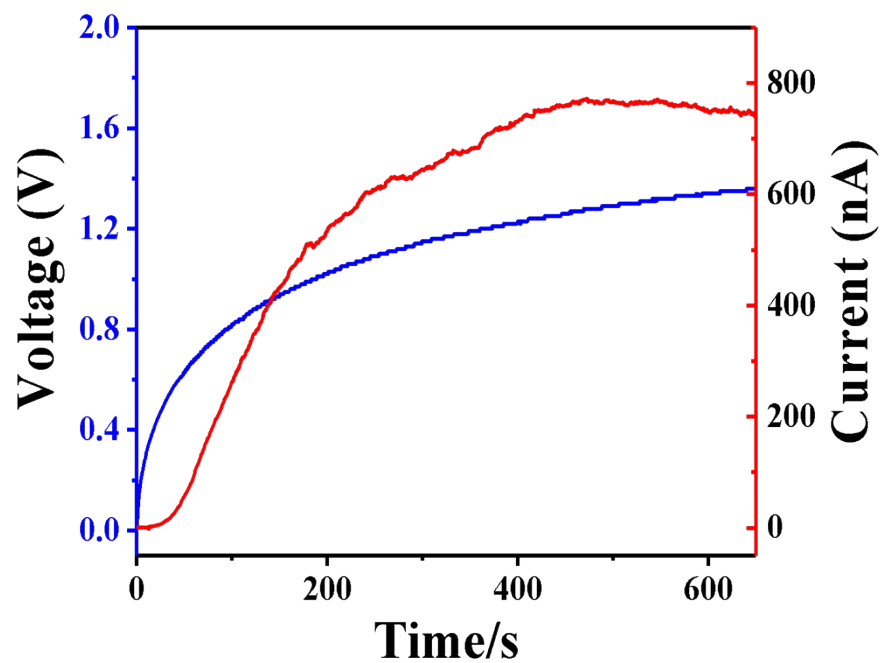

Fig. S9 Generated voltage and current from a pack of five series-connected PMEGs based on acidified print paper.

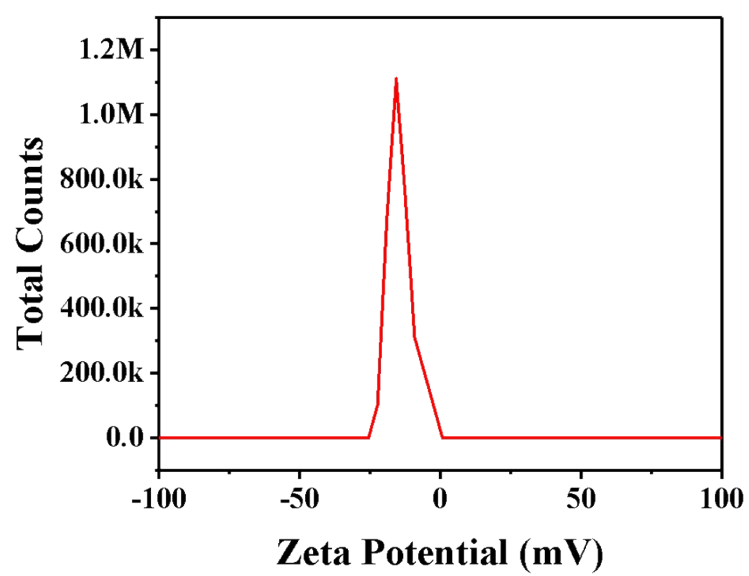

Fig. S10 Zeta potential of acidified print paper.

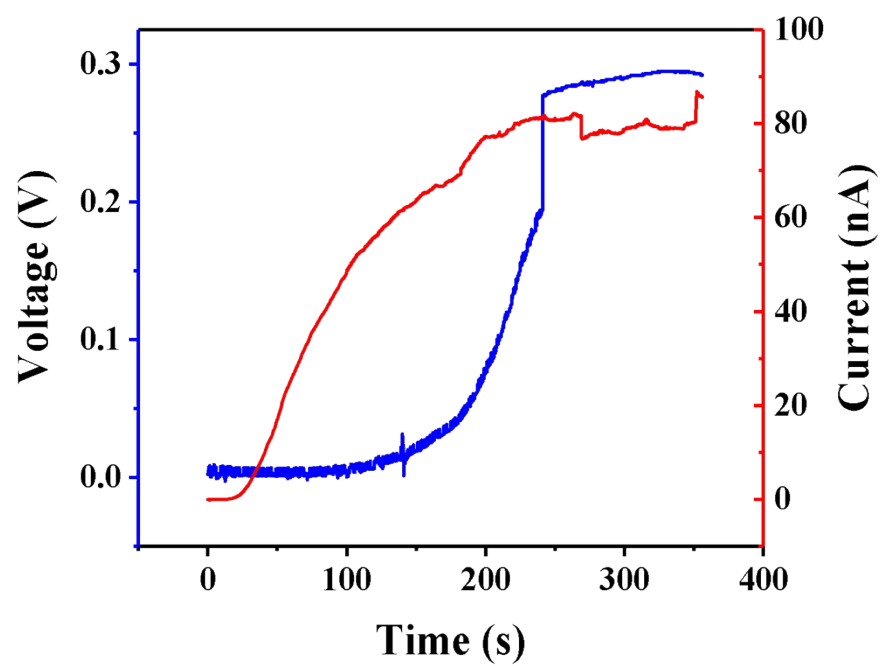

Fig. S11 Generated voltage and current of print paper treated by  $\text{CH}_3\text{CH}_2\text{COOH}$ .

Sample area:  $1.5\text{cm}^2$

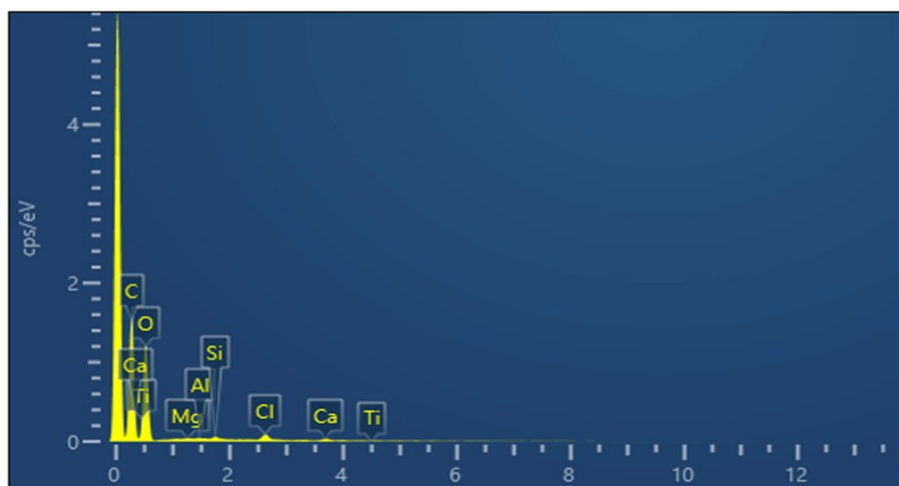

Fig. S12 EDS characterization of acidified print paper.

Table S2 Surface elemental composition of acidified print paper.

| Elements | Mass % | Atomic % |
|----------|--------|----------|
| C        | 48.955 | 56.535   |
| O        | 49.355 | 42.795   |
| Ti       | 0.000  | 0.000    |
| S        | 0.010  | 0.005    |
| Cl       | 0.900  | 0.350    |
| Al       | 0.020  | 0.010    |
| Si       | 0.220  | 0.105    |
| Mg       | 0.035  | 0.020    |
| Ca       | 0.505  | 0.175    |
| Total    | 100.00 | 100.00   |

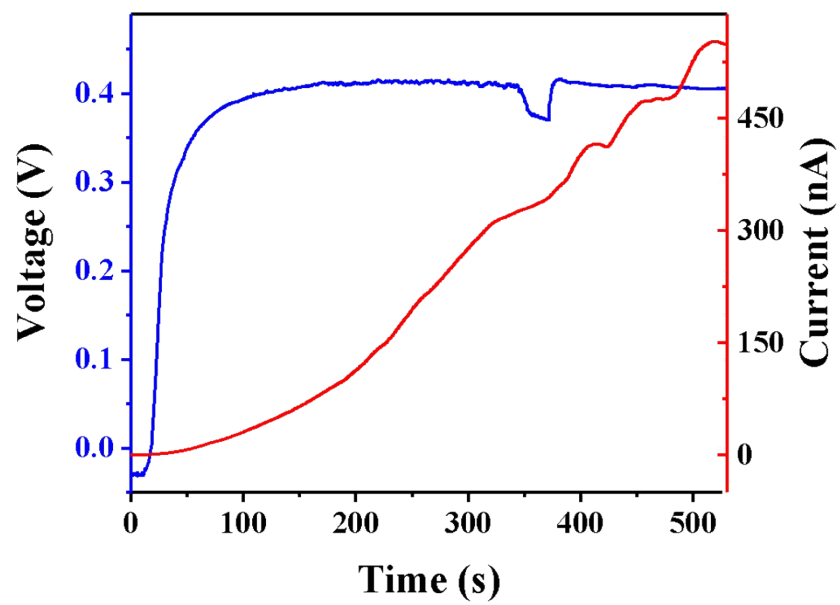

Fig. S13 Generated voltage and current of filter paper treated by 1M HCl solution.

Hygroelectric material area: 1.5 cm<sup>2</sup>

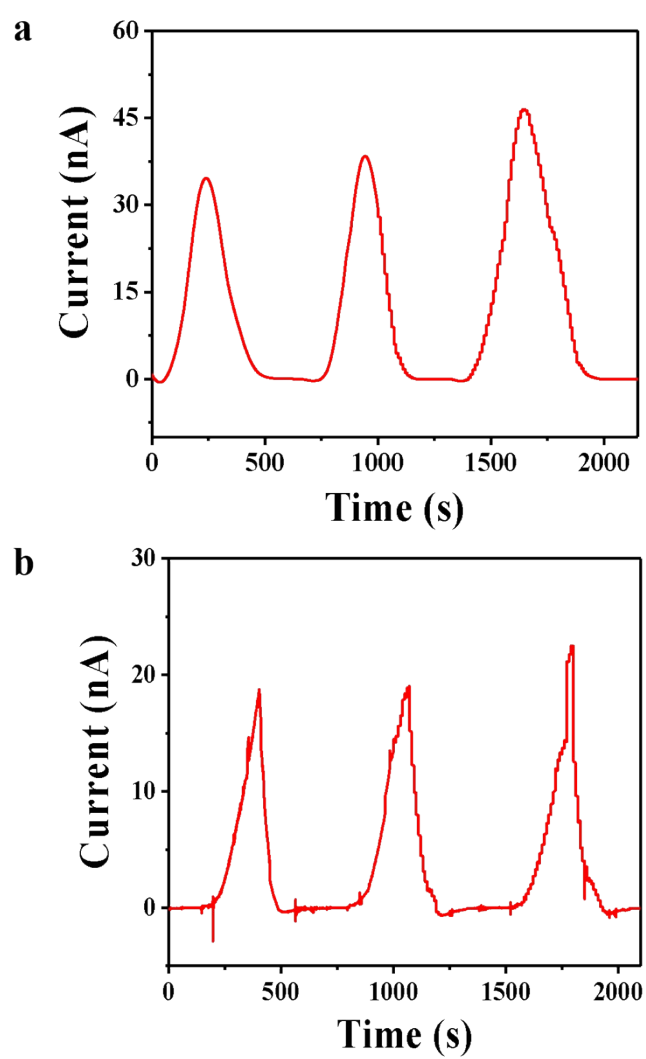

Fig. S14 (a) Generated current of paper crane. (b) Generated current of paper fan.  
Sample area: 1.5cm<sup>2</sup>

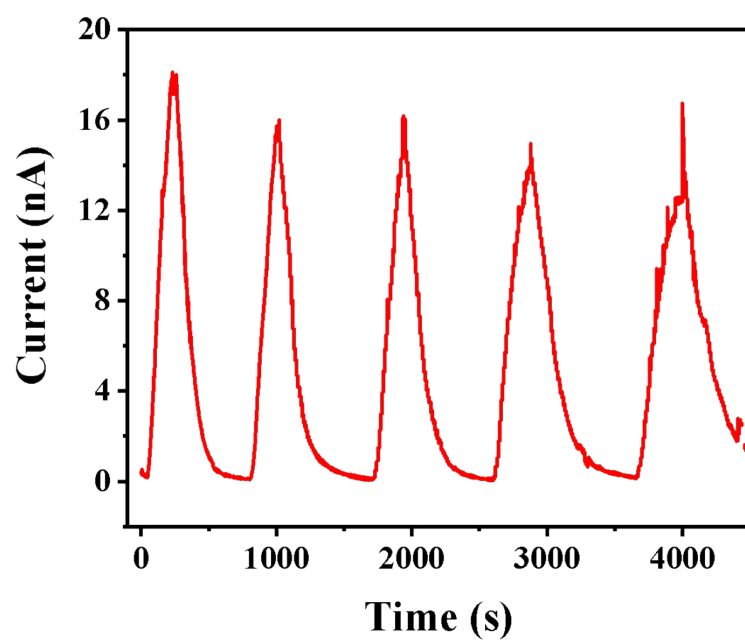

Fig. S15 Generated current of one PMEG unit.

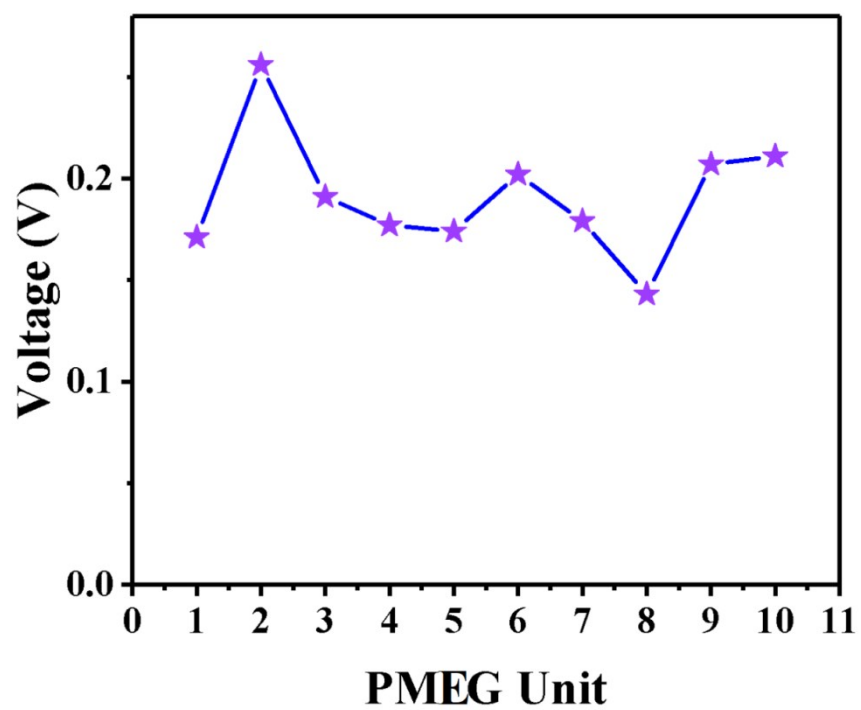

Fig. S16 Generated voltage of every PMEG unit.

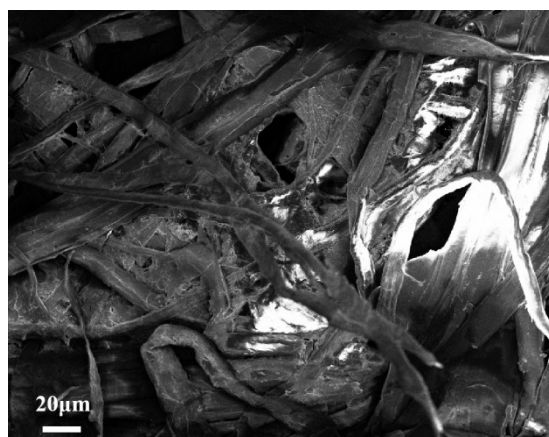

Fig. S17 SEM image of rice paper showing that rice paper has larger holes than print paper (shown in Fig. 1d).
